# Supplementary material
Source: PubMed Central journal article supplement (PMC5645019)
Supplement: NIHMS794665-supplement-Supporting_Information.pdf [file NIHMS794665-supplement-Supporting_Information.pdf]

# Supporting Information

## Tracking Mesenchymal Stromal Cells using an Ultra-Bright TAT-Functionalized Plasmonic-Active Nanoplatfom

*Hsiangkuo Yuan<sup>1†</sup>, Jose A. Gomez<sup>2†</sup>, Jennifer S. Chien<sup>2</sup>, Lunan Zhang<sup>2</sup>, Christy M. Wilson<sup>3</sup>, Shuqin Li<sup>3</sup>, Andrew M. Fales<sup>1</sup>, Yang Liu<sup>1,4</sup>, Gerald A. Grant<sup>3</sup>, Maria Mirotsoy<sup>2</sup>, Victor J. Dzau<sup>2</sup>, Tuan Vo-Dinh<sup>1,4\*</sup>*

\*Corresponding Author: [tuan.vodinh@duke.edu](mailto:tuan.vodinh@duke.edu)

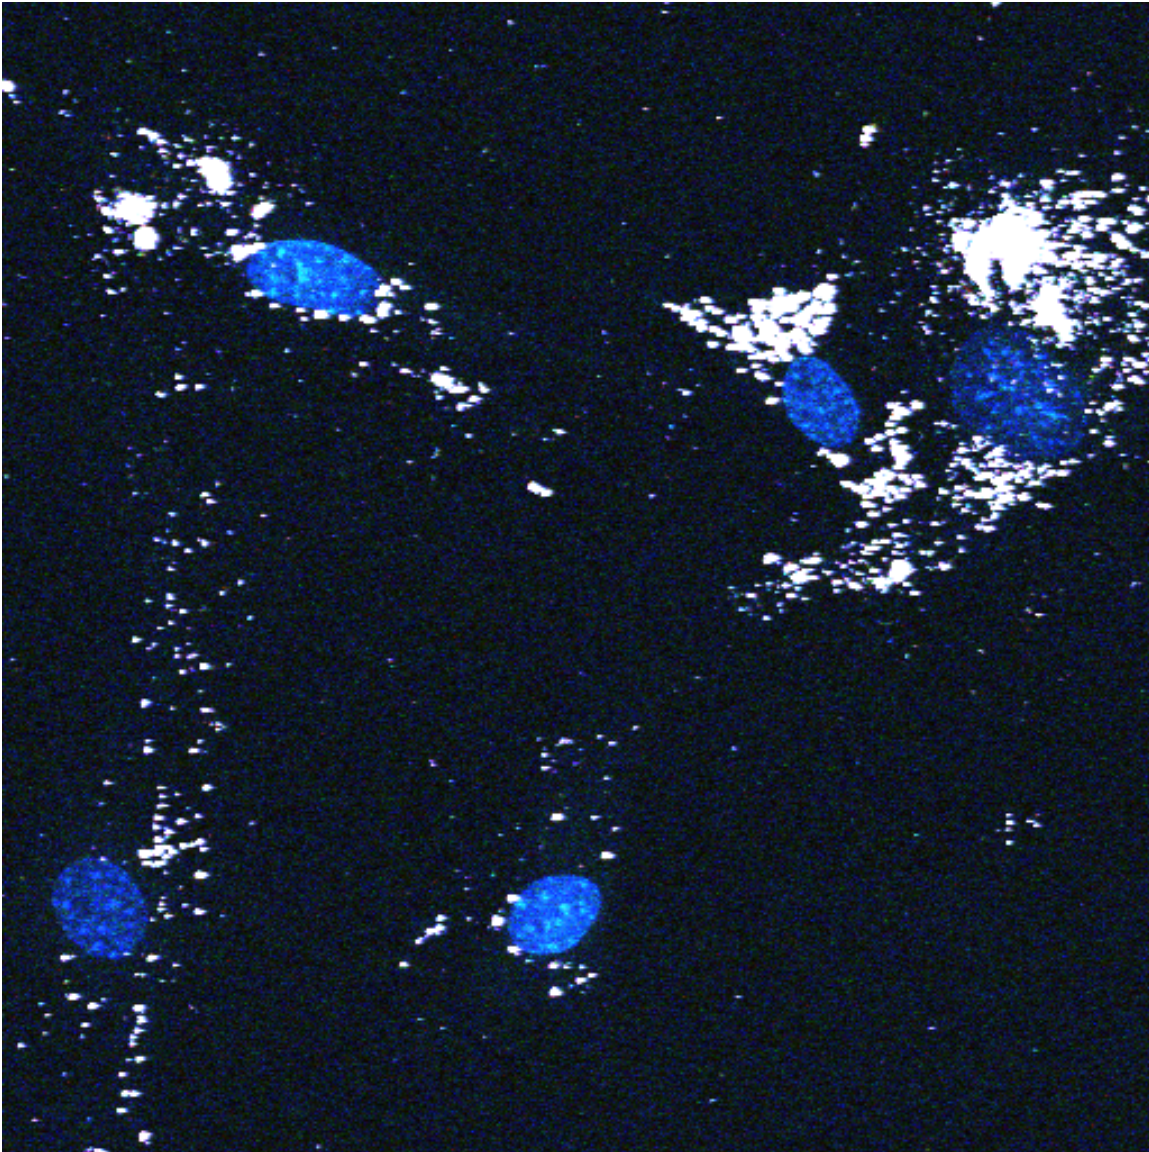

**Figure S1.** Chase 4 experiment (Q-Tracker and TAT-GNS co-incubated) at day 4. GNS signal was predominant. There may still be Q-Tracker but just too difficult to distinguish its signal from GNS signal (white). Nuclei were stained blue. Image size 256x256  $\mu\text{m}$ .

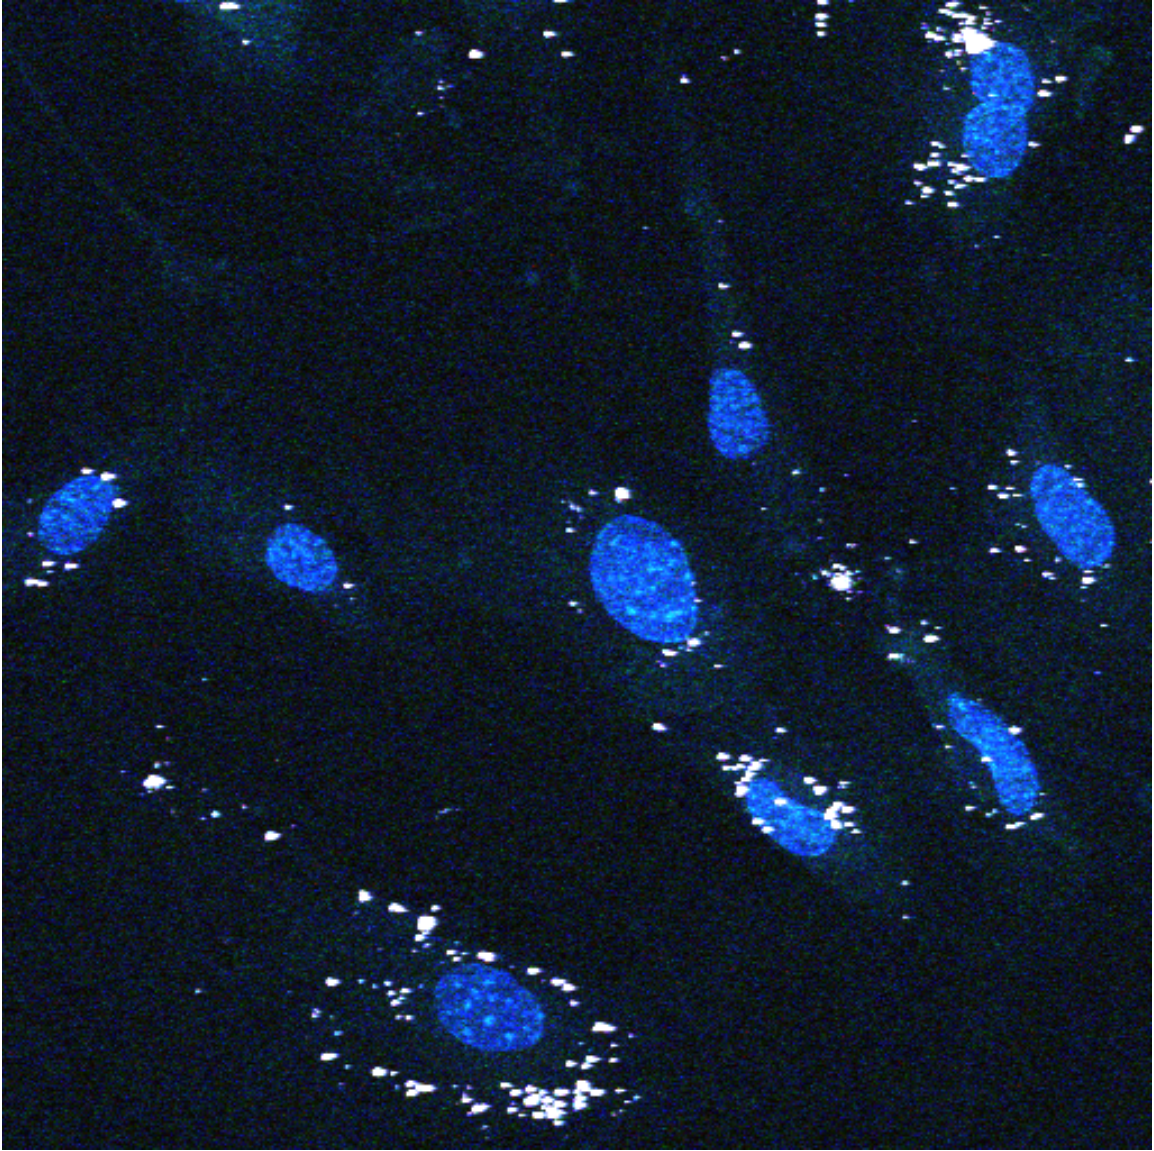

**Figure S2.** Chase 2 experiment (Q-Tracker-MSC and TAT-GNS-MSC co-cultured) at day 4. GNS signal (white) predominated. Nuclei were stained blue. Image size 256x256  $\mu\text{m}$ .

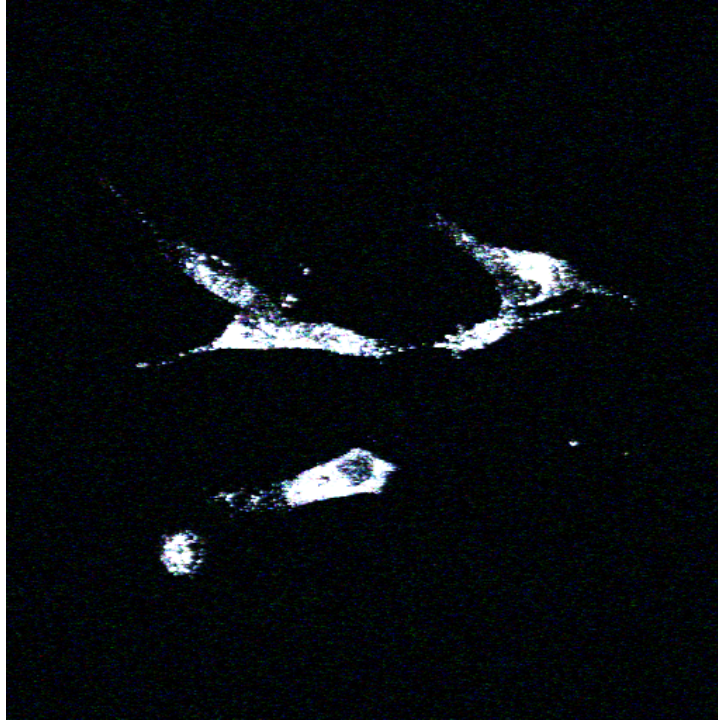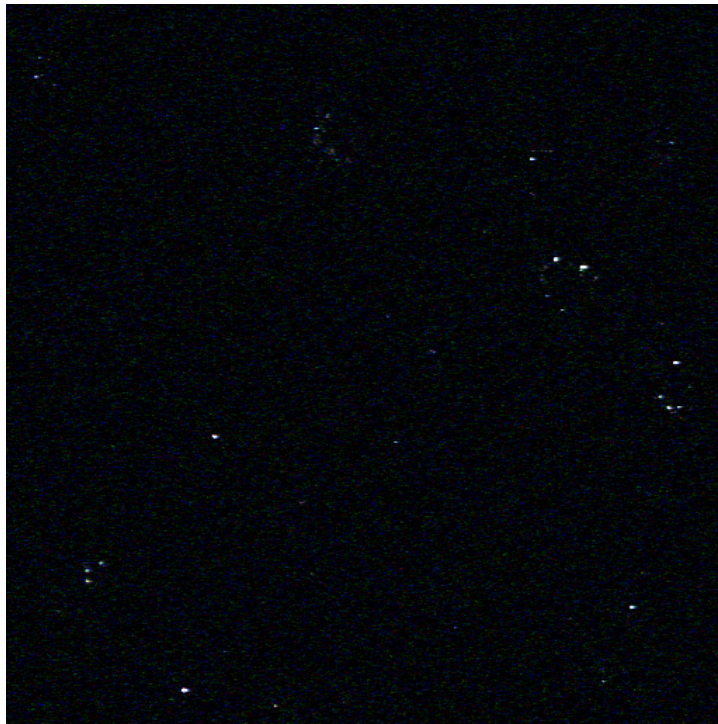

**Figure S3.** The intracellular TAT-GNS decreases over time. Calculated the pixel intensity under the same excitation laser power, GNS signal (white) at day 1 (top) was estimated 10-fold more than at day 8 (bottom). Image size 256×256  $\mu\text{m}$ .

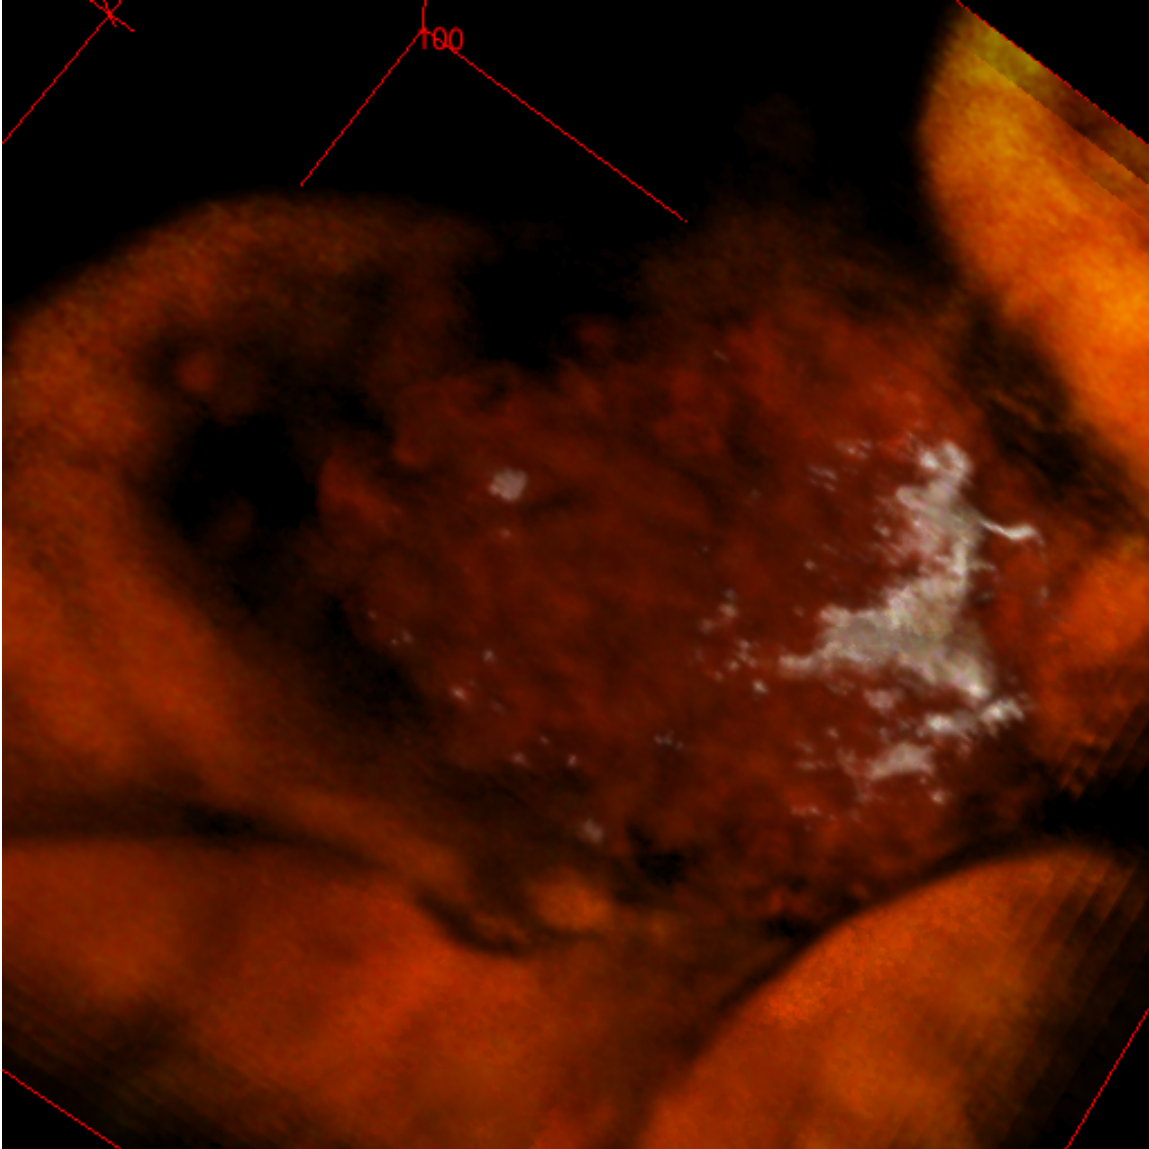

**Figure S4.** 3D reconstructed imaging of a cell cluster. Cytoplasm was stained orange (FM 1-43 FX) and GNS were white. While some GNS can be found inside MSCs (smaller white domains), some GNS seemed to form agglomerate (large white domain) outside the cells. Image size 125x125  $\mu\text{m}$ .
